# Supplementary material for: Nature of the surface space charge layer on undoped SrTiO3(001)
Source: Royal Society of Chemistry journal article supplement (doi:10.1039/d1tc03436g), 2021-01-01
Supplement: d1tc03436g1.pdf [file d1tc03436g1.pdf]

## Electronic Supplementary Information (ESI)

### **Nature of surface space charge layer on *undoped* SrTiO<sub>3</sub> (001)**

Hojoon Lim<sup>1, #</sup>, Chanyang Song<sup>1, #</sup>, Minsik Seo<sup>1</sup>, Dongwoo Kim<sup>1</sup>, Moonjung Jung<sup>1</sup>, Habin Kang<sup>1</sup>,  
Seunghwan Kim<sup>1</sup>, Kyung-Jae Lee<sup>1</sup>, Youngseok Yu<sup>2</sup>, Geonhwa Kim<sup>3</sup>, Ki-jeong Kim<sup>3, \*</sup>, Bongjin  
Simon Mun<sup>1, 4, \*</sup>

<sup>1</sup>Department of Physics and Photon Science, Gwangju Institute of Science and Technology, Gwangju 61005, Republic of Korea

<sup>2</sup>Research Center for Materials Analysis, Korea Basic Science Institute, Daejeon 34133, Republic of Korea

<sup>3</sup>Beamline Research Division, Pohang Accelerator Laboratory, Pohang 37674, Republic of Korea

<sup>4</sup>Center for Advanced X-ray Science, Gwangju Institute of Science and Technology, Gwangju 61005, Republic of Korea

<sup>#</sup> Equally contribute to this work

<sup>\*</sup>Corresponding author; E-mail: [kjkim@postech.ac.kr](mailto:kjkim@postech.ac.kr), [bsmun@gist.ac.kr](mailto:bsmun@gist.ac.kr)

**1. Images of AFM topography before and after a deionized-water leaching and thermal annealing treatment on SrTiO<sub>3</sub> (001) surface**

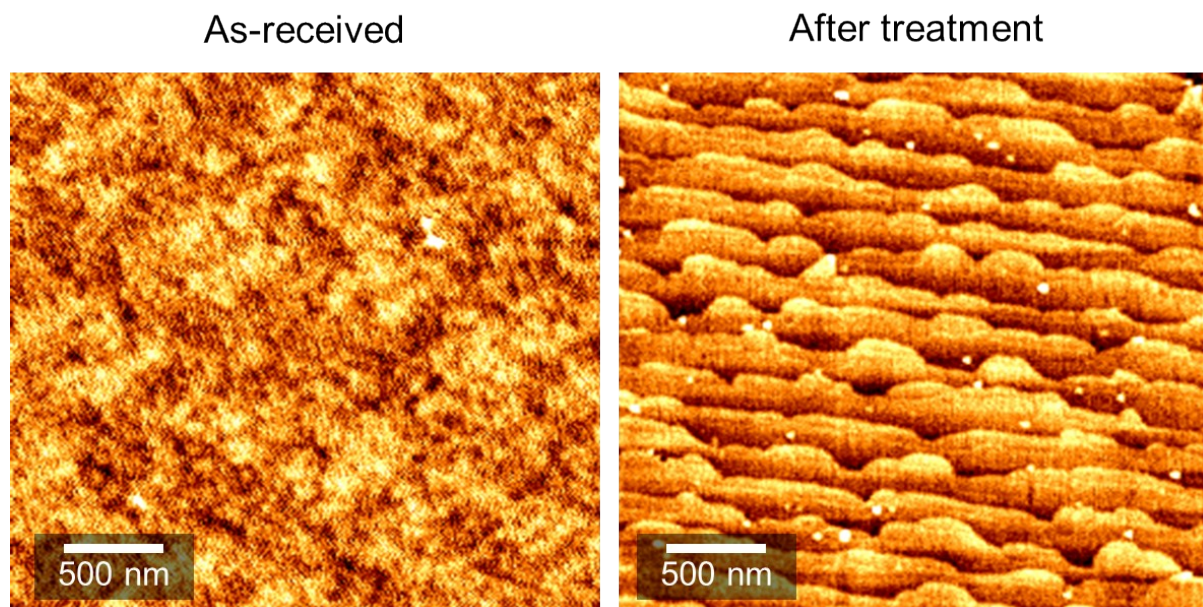

**Figure S1.** AFM topography images of SrTiO<sub>3</sub> (001) film for (left) as-received and (right) after 2 treatment cycles of a deionized-water leaching and thermal annealing treatment, *i.e.*, air annealing (1000°C, 1 hour) and DI water leaching (30 sec). An atomically flat and step-terraced surface structure can be seen on the right image.

## 2. Photon energy values for each probing depth and element

| Probing depth \ Element | O 1s   | Ti 2p  | C 1s & Sr 3p | Sr 3d  |
|-------------------------|--------|--------|--------------|--------|
| 3.3 nm                  | 920 eV | 810 eV | 710 eV       | 520 eV |
| 2.4 nm                  | 810 eV | 710 eV | 520 eV       | 380 eV |
| 1.5 nm                  | 710 eV | 520 eV | 380 eV       | 250 eV |

**Table S1.** Photon energy values used for depth profiling of each element considering the formula of TPP 2M.<sup>S1</sup>

### 3. Band gap energy and conductivity of SrTiO<sub>3</sub> under both UHV and O<sub>2</sub> condition

| Temperature (°C) | E <sub>g</sub> (eV) | $\sigma$ ( $\Omega^{-1}\text{cm}^{-1}$ ) at UHV ( $10^{-9}$ mbar) | $\sigma$ ( $\Omega^{-1}\text{cm}^{-1}$ ) at O <sub>2</sub> 0.1 mbar |
|------------------|---------------------|-------------------------------------------------------------------|---------------------------------------------------------------------|
| 600              | 2.90                | $\sim 1.43 \times 10^{-5}$                                        | $\sim 7.41 \times 10^{-6}$                                          |
| 500              | 2.99                | $\sim 7.19 \times 10^{-7}$                                        | $\sim 3.72 \times 10^{-6}$                                          |
| 400              | 3.05                | $\sim 1.88 \times 10^{-8}$                                        | $\sim 9.74 \times 10^{-8}$                                          |
| 300              | 3.12                | $\sim 1.19 \times 10^{-10}$                                       | $\sim 6.16 \times 10^{-10}$                                         |
| 200              | 3.17                | $\sim 1.08 \times 10^{-13}$                                       | $\sim 5.59 \times 10^{-12}$                                         |
| 100              | 3.24                | $\sim 1.53 \times 10^{-18}$                                       | $\sim 7.92 \times 10^{-16}$                                         |
| 0                | 3.28                | $\sim 9.97 \times 10^{-27}$                                       | $\sim 5.16 \times 10^{-29}$                                         |

**Table S2.** The band gap energies and conductivities of SrTiO<sub>3</sub> at each temperature under UHV ( $10^{-9}$  mbar) and O<sub>2</sub> (0.1 mbar) conditions calculated from the references.<sup>S2, S3</sup>

#### 4. Apparent binding energy of C 1s before the energy calibration

|              | UHV       |           |           | O <sub>2</sub> 0.1 mbar |           |           |
|--------------|-----------|-----------|-----------|-------------------------|-----------|-----------|
|              | 1.5 nm    | 2.4 nm    | 3.3 nm    | 1.5 nm                  | 2.4 nm    | 3.3 nm    |
| <b>200°C</b> | 284.92 eV | 285.51 eV | 285.55 eV | 284.43 eV               | 284.67 eV | 285.04 eV |
| <b>400°C</b> | 284.60 eV | 284.58 eV | 284.76 eV | 283.61 eV               | 283.60 eV | 283.87 eV |
| <b>500°C</b> | 284.66 eV | 284.64 eV | 284.76 eV | -                       | -         | -         |
| <b>600°C</b> | 284.60 eV | 284.65 eV | 284.72 eV | -                       | -         | -         |

**Table S3.** C 1s binding energy of each pressure condition before the energy calibration. All C 1s binding energies are calibrated to 284.5 eV.<sup>S4</sup>

## 5. Characteristic core level spectra under both O<sub>2</sub> 0.1 mbar and UHV condition

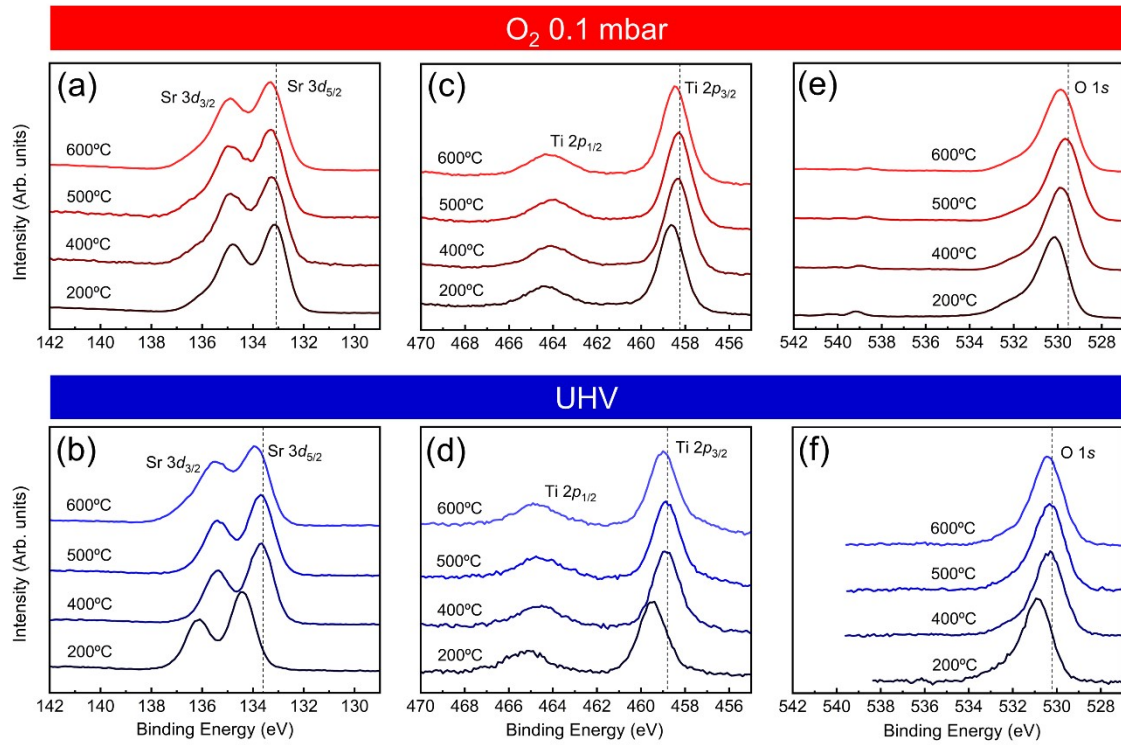

**Figure S2.** AP-XP spectra of SrTiO<sub>3</sub> (001) films during thermal annealing under both O<sub>2</sub> 0.1 mbar [red series, (a), (c), (e)] and UHV [blue series, (b), (d), (f)] condition with the surface sensitive probing depth of 1.5 nm. Core level spectra of Sr 3d [(a), (b)], Ti 2p [(c), (d)], and O 1s [(e), (f)] are displayed for each annealing temperature step. The dotted vertical lines indicate the binding energy positions of SrTiO<sub>3</sub> lattice components at 500°C.

## 6. XPS fitting parameter for Sr 3d spectra under both O<sub>2</sub> and UHV condition

|                         |       | Sr 3d <sub>5/2</sub> (SrO <sub>1+x</sub> ) |           | Sr 3d <sub>5/2</sub> (SrTiO <sub>3</sub> ) |           |
|-------------------------|-------|--------------------------------------------|-----------|--------------------------------------------|-----------|
|                         |       | Binding energy (eV)                        | FWHM (eV) | Binding energy (eV)                        | FWHM (eV) |
| O <sub>2</sub> 0.1 mbar | 200°C | 133.88                                     | 1.39      | 133.05                                     | 1.00      |
|                         | 400°C | 133.93                                     | 1.60      | 133.12                                     | 1.07      |
|                         | 500°C | 133.97                                     | 1.67      | 133.16                                     | 1.10      |
|                         | 600°C | 133.99                                     | 1.62      | 133.18                                     | 1.13      |
| UHV                     | 200°C | 135.00                                     | 1.10      | 134.37                                     | 1.14      |
|                         | 400°C | 134.36                                     | 1.09      | 133.65                                     | 1.11      |
|                         | 500°C | 134.39                                     | 1.18      | 133.64                                     | 1.15      |
|                         | 600°C | 134.58                                     | 1.48      | 133.76                                     | 1.11      |

**Table S4.** Spectral fitting parameters for Sr 3d AP-XP spectra in Fig. 1(b) and (c). Binding energy positions of SrO<sub>1+x</sub> and SrTiO<sub>3</sub> component are referenced in Ref. (S5).<sup>S5</sup> Full width half maximum (FWHM) values and separations of doublets at each gaseous environment are referenced in Ref. (S6).<sup>S6</sup>

## 7. Comparison of surface chemical states under both O<sub>2</sub> and UHV condition at 600°C

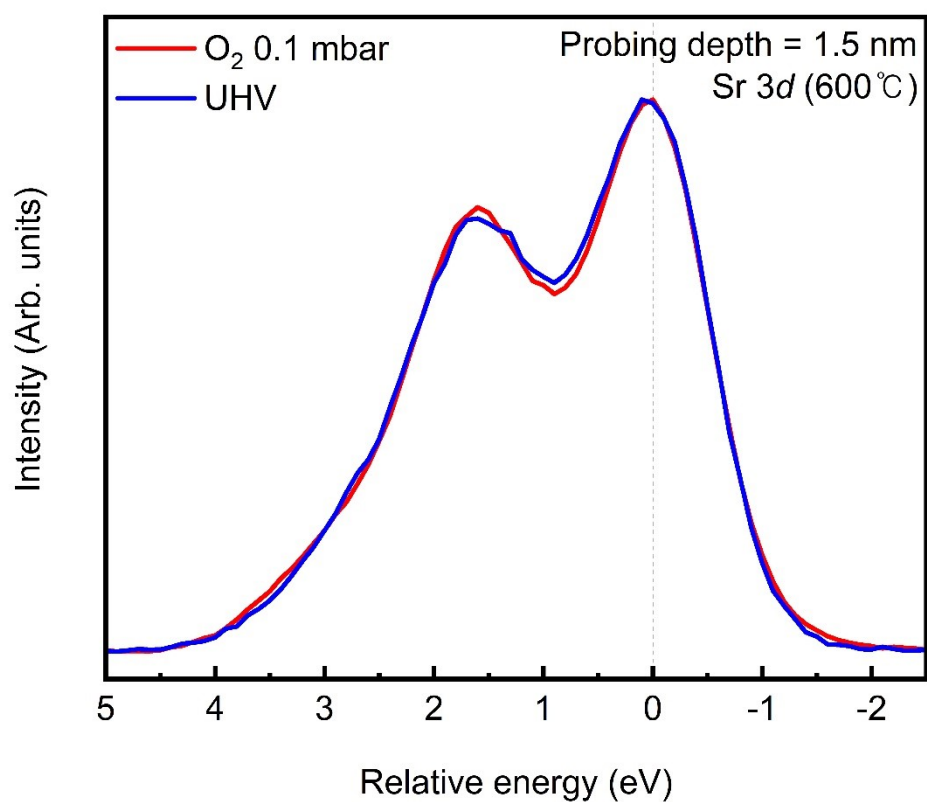

**Figure S3.** AP-XP spectra of Sr 3d obtained at 600°C with probing depth of 1.5 nm during both O<sub>2</sub> (red) and UHV (blue) condition. To compare spectral shapes, Sr 3d spectra are superimposed to binding energy positions for SrTiO<sub>3</sub> lattice peaks. Sr 3d spectra under both conditions are almost identical, showing the formation of the same *surface chemical states* under both conditions.



## 8. Comparison of spectral shapes under both O<sub>2</sub> 0.1 mbar and UHV condition

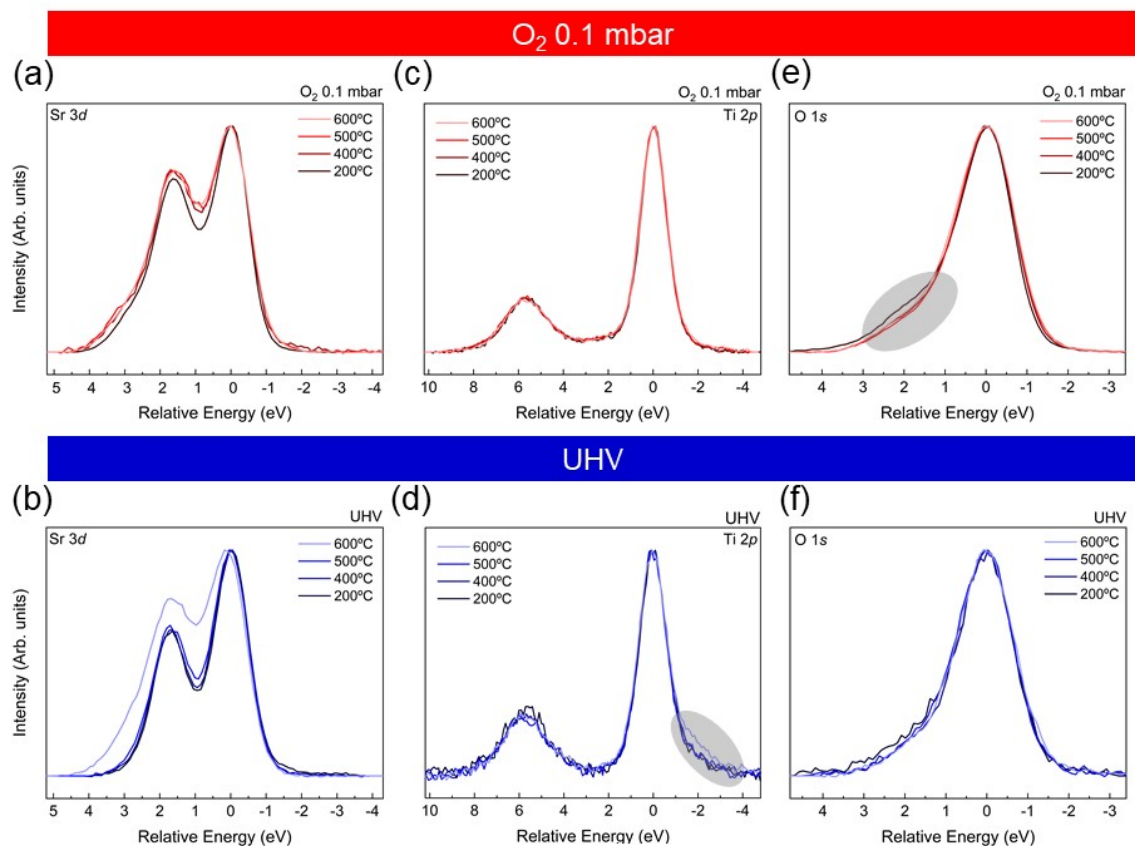

**Figure S4.** Entire set of spectra in Fig. S2 are superimposed on the binding energy positions of SrTiO<sub>3</sub> lattice peaks. For Sr 3d spectra, the formation of SrO<sub>1+x</sub> surface oxide is clearly observed under both annealing conditions as discussed in this report. In Ti 2p spectra of (d), gray shaded area reveals emergence of Ti<sup>3+</sup> component and formation of O vacancy (V<sub>O</sub>) only during UHV annealing process. During O<sub>2</sub> annealing, spectral weight corresponding to hydroxide is reduced, shown in (e).

## 9. Sign of O vacancy formation under UHV in valence band region

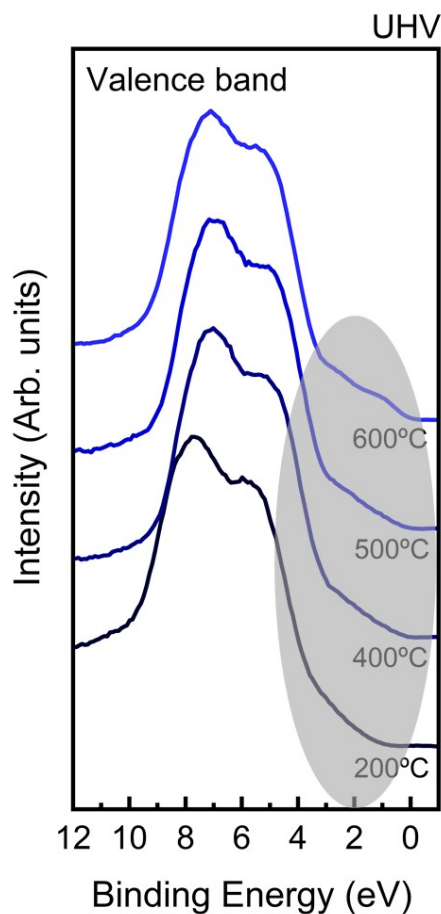

**Figure S5.** Valence band (VB) spectra of SrTiO<sub>3</sub> (001) film at probing depth of 1.5 nm under UHV condition during annealing from 200°C up to 600°C. During annealing in UHV, TiO<sub>2</sub> layer in SrTiO<sub>3</sub> are gradually reduced, *i.e.*, the formation of V<sub>O</sub>. This feature is clearly visible in the gray shaded area by the enhancement of spectral weight as temperature increases, which is in good agreement with previous report.<sup>S7</sup>

## 10. Binding energy offsets between both O<sub>2</sub> and UHV condition

|       | O 1s   |                            |                                                | Ti 2p <sub>3/2</sub> |                            |                                                | Sr 3d <sub>5/2</sub> |                            |                                                | Averaged<br>$\Delta$ |
|-------|--------|----------------------------|------------------------------------------------|----------------------|----------------------------|------------------------------------------------|----------------------|----------------------------|------------------------------------------------|----------------------|
|       | UHV    | O <sub>2</sub><br>0.1 mbar | $\Delta$<br>(UHV –<br>O <sub>2</sub> 0.1 mbar) | UHV                  | O <sub>2</sub><br>0.1 mbar | $\Delta$<br>(UHV –<br>O <sub>2</sub> 0.1 mbar) | UHV                  | O <sub>2</sub><br>0.1 mbar | $\Delta$<br>(UHV –<br>O <sub>2</sub> 0.1 mbar) |                      |
| 200°C | 530.87 | 530.12                     | 0.75                                           | 459.50               | 458.62                     | 0.88                                           | 134.37               | 133.05                     | 1.32                                           | 0.98                 |
| 400°C | 530.29 | 529.80                     | 0.49                                           | 458.84               | 458.34                     | 0.50                                           | 133.65               | 133.12                     | 0.53                                           | 0.51                 |
| 500°C | 530.27 | 529.61                     | 0.66                                           | 458.82               | 458.30                     | 0.52                                           | 133.64               | 133.16                     | 0.48                                           | 0.55                 |
| 600°C | 530.37 | 529.83                     | 0.54                                           | 458.97               | 458.44                     | 0.53                                           | 133.76               | 133.18                     | 0.58                                           | 0.55                 |

**Table S5.** Characteristic binding energy positions of O 1s, Ti 2p<sub>3/2</sub>, and Sr 3d<sub>5/2</sub> as a function of annealing temperature in Fig. 4(a). The  $\Delta$  values, the binding energy offset values between UHV and O<sub>2</sub> conditions, are calculated for each temperature and each core level. In particular, the  $\Delta$  values at temperatures above 400°C, when charging effect is completely compensated, are displayed in blue (400°C), orange (500°C), and red (600°C), respectively. The averaged  $\Delta$  values at the rightmost of the table are the average values of the binding energy offset values at each temperature, *i.e.*, average of  $\Delta$  values of O 1s, Ti 2p<sub>3/2</sub>, and Sr 3d<sub>5/2</sub>. At temperatures above 400°C, the binding energy offset values are almost constant,  $\sim 0.54$  eV on average, signaling the band bends upward by  $\sim 0.54$  eV during O<sub>2</sub> annealing.

## 11. Observation of upward band bending under O<sub>2</sub> annealing in valence band spectra

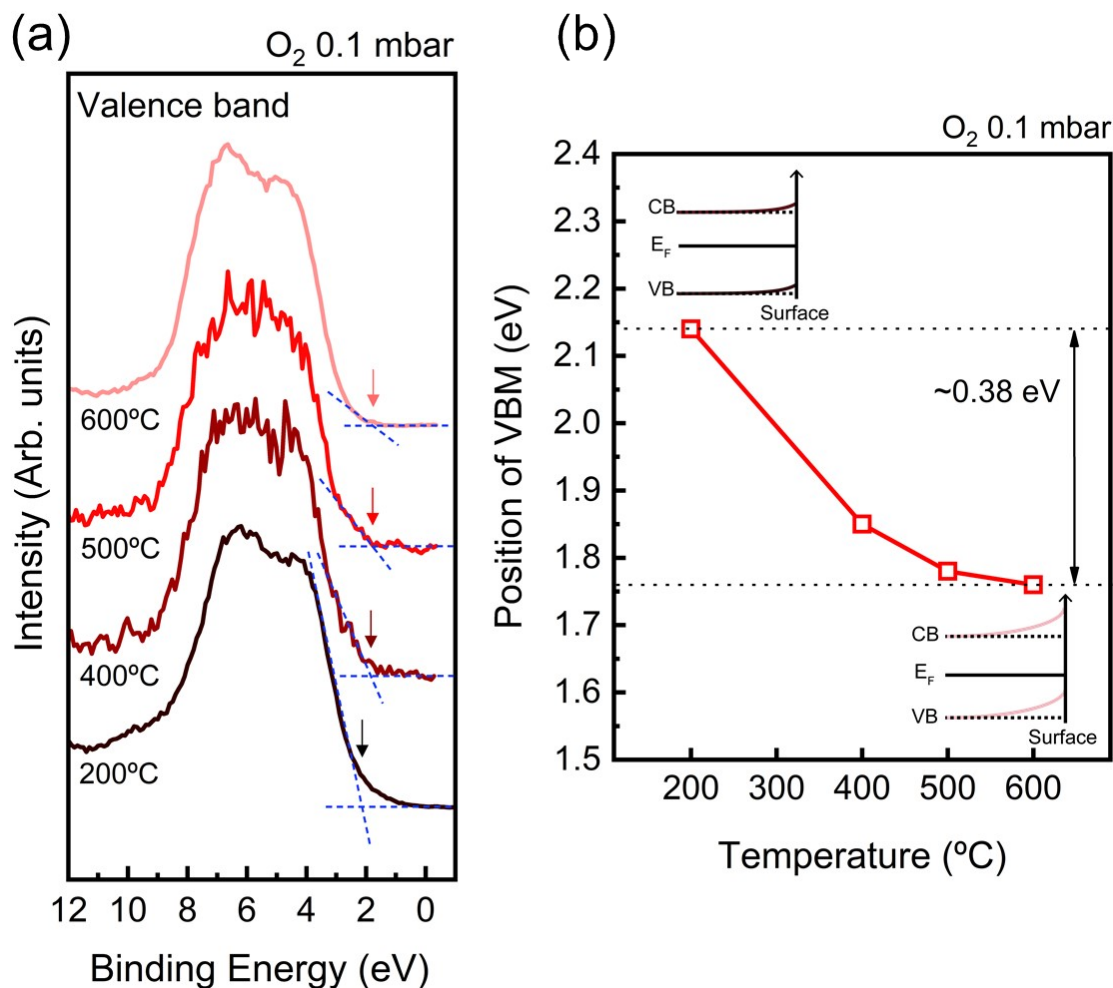

**Figure S6.** (a) VB spectra of SrTiO<sub>3</sub> (001) film at probing depth of 1.5 nm and O<sub>2</sub> pressure of 0.1 mbar during annealing from 200°C up to 600°C. The position of valence band maximum (VBM) is determined as the intersection of the leading edge (blue dotted line) of the VB spectra and background. The positions of VBM as a function of annealing temperature are plotted in (b). As annealing temperature increases up to 600°C, the position of VBM is shifted from 2.14 eV to 1.76 eV. This means that as the annealing temperature increases during the O<sub>2</sub> annealing process, the formation of surface space charge layer and upward band bending become more pronounced.

## 12. Calculation of Debye length

The discussion of space charge layer is only valid when Debye length is bigger than the scales of the space charge layer. Therefore, in order to discuss the formation and characteristics of the space charge layer by charge separation, the Debye length is calculated and compared.

Debye length of a material  $L_D$  can be given as<sup>S8</sup>:

$$L_D = \sqrt{\frac{\epsilon_0 \epsilon_r k_B T}{e^2 n}}$$

where,  $\epsilon_0$ : permittivity of free space ( $\sim 8.85 \times 10^{-12} \text{ F}\cdot\text{m}^{-1}$ )

$\epsilon_r$ : dielectric constant

$k_B$ : Boltzmann constant ( $\sim 1.38 \times 10^{-23} \text{ J}\cdot\text{K}^{-1}$ )

$T$ : temperature of a material

$e$ : elementary charge ( $\sim 1.60 \times 10^{-19} \text{ C}$ )

$n$ : charge density

|       | $\epsilon_r$ | $n \text{ (m}^{-3}\text{)}$ | $L_D \text{ (m)}$          |
|-------|--------------|-----------------------------|----------------------------|
| 600°C | $\sim 4630$  | $\sim 1.13 \times 10^{22}$  | $\sim 1.31 \times 10^{-6}$ |
| 500°C | $\sim 3220$  | $\sim 5.05 \times 10^{20}$  | $\sim 4.84 \times 10^{-6}$ |
| 400°C | $\sim 2020$  | $\sim 4.24 \times 10^{17}$  | $\sim 1.24 \times 10^{-4}$ |
| 300°C | $\sim 510$   | $\sim 2.19 \times 10^{13}$  | $\sim 7.98 \times 10^{-3}$ |
| 200°C | $\sim 180$   | $\sim 1.70 \times 10^7$     | $\sim 4.89$                |
| 100°C | $\sim 200$   | $\sim 3.50 \times 10^{-3}$  | $\sim 3.19 \times 10^5$    |
| 0°C   | $\sim 240$   | $\sim 8.95 \times 10^{-20}$ | $\sim 5.91 \times 10^{13}$ |

**Table S6.** Dielectric constant ( $\epsilon_r$ ) and charge density ( $n$ ) values of  $\text{SrTiO}_3$  as a function of temperature.<sup>S9, S2, S3</sup> Charge density values are calculated by extrapolation from the references<sup>S2, S3</sup>, and Debye length is calculated by substituting the dielectric constant and charge density values at each temperature into the above formula.

As can be seen from Table S6, the thickness of the space charge layer within our probing depth ( $< 3.3$  nm) is much smaller than Debye length. Therefore, our discussion on the nature of space charge layer is valid.

## References

- S1 S. Tanuma, C. J. Powell and D. R. Penn, *Surf. interface Anal.*, 1994, **21**, 165–176
- S2 T. Bieger, J. Maier, R. Waser, *Solid State Ionics.*, 1992, **53–56**, 578–582.
- S3 R. C. Hatch, M. Choi, A. B. Posadas, A. A. Demkov, *J. Vac. Sci. Technol. B, Nanotechnol. Microelectron. Mater. Process. Meas. Phenom.*, 2015, **33**, 061204.
- S4 J. F. Moulder, W. F. Stickle, P. E. Sobol and K. D. Bomben, *Handbook of X-ray Photoelectron Spectroscopy*, United States of America, 1993.
- S5 R. C. Hatch, M. Choi, A. B. Posadas, A. A. Demkov, *J. Vac. Sci. Technol. B, Nanotechnol. Microelectron. Mater. Process. Meas. Phenom.*, 2015, **33**, 061204.
- S6 G. M. Vanacore, L. F. Zagonel, N. Barrett, *Surf. Sci.*, 2010, **604**, 1674–1683.
- S7 R. C. Hatch, K. D. Fredrickson, M. Choi, C. Lin, H. Seo, A. B. Posadas, A. A. Demkov, *J. Appl. Phys.*, 2013, **114**, 103710.
- S8 W. Mönch, *Electronic Properties of Semiconductor Interfaces*, Springer-Verlag Berlin Heidelberg, 2004
- S9 N. F. Muhamad, R. A. M. Osman, M. S. Idris, M. N. M. Yasin, *EDP Sciences*, 2017, **162**, 01052
